# Supplementary material for: Autopsy or anatomical dissection: evidence of a craniotomy in a 17th–eighteenth century burial site (Ravenna, Italy)
Source: Springer Nature journal article supplement (doi:10.1007/s12024-020-00285-6), 2020-08-08
Supplement: MOESM1 [file 18259156]

## Electronic Supplementary Material

Tab. S1 – Features of the lesions found in Individual US-217 and their timing. The analyses were carried out with the method and the form of Scianò et al. 2020 [47].

| Archaeological site: Church of San Biagio (Ravenna) |                |                                     | Individual: US 217                                                                                                                                                                                                                                                                                                                                                      |
|-----------------------------------------------------|----------------|-------------------------------------|-------------------------------------------------------------------------------------------------------------------------------------------------------------------------------------------------------------------------------------------------------------------------------------------------------------------------------------------------------------------------|
| Type of lesion                                      | Time of trauma | Healing process                     | Bony responses                                                                                                                                                                                                                                                                                                                                                          |
| <b>Circumferential lesion</b>                       | Perimortem     | Absence of bony response or healing | <ul style="list-style-type: none"> <li>• Edges of injuries irregular and shaped; hinging bone fragments.</li> <li>• Cortical bone flakes along fracture margins.</li> <li>• Internal or/and external smoothed margins.</li> <li>• Radiating and concentric fractures.</li> <li>• Staining maintained along fracture margins.</li> <li>• Plastic deformation.</li> </ul> |
| <b>Lesion of frontal bone</b>                       | Perimortem     | Absence of bony response or healing | <ul style="list-style-type: none"> <li>• Edges of injuries irregular and shaped; hinging bone fragments.</li> <li>• Cortical bone flakes along fracture margins.</li> <li>• Internal or/and external smoothed margins.</li> <li>• Radiating and concentric fractures.</li> <li>• Staining maintained along fracture margins.</li> </ul>                                 |
